# Supplementary material
Source: PubMed Central journal article supplement (PMC4282923)
Supplement: NIHMS502232-supplement-supplement_1.pdf [file NIHMS502232-supplement-supplement_1.pdf]

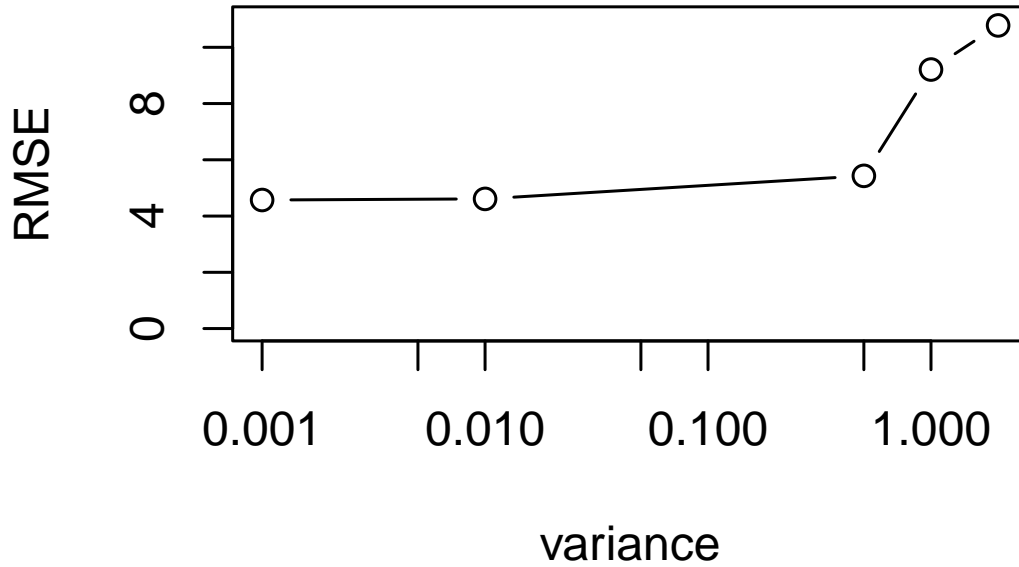

**Supplementary Figure 1. Effect of population size variance on the estimation of the origin.** We show the effect of variance in population size on our ability to estimate the origin of a range expansion. RMSE increases only slightly if the variance is below 0.1, but increases quite drastically if the variance is higher than that.

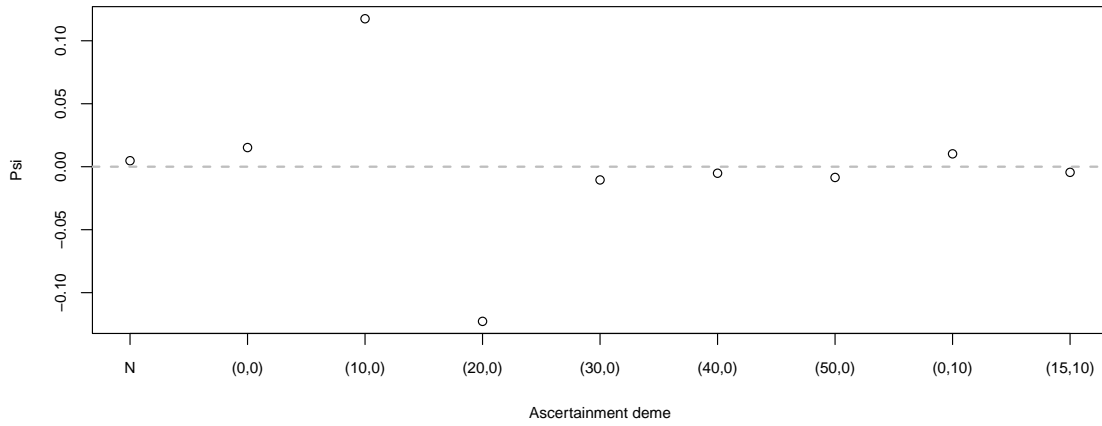

**Supplementary Figure 2. Effect of ascertainment bias on  $\psi$ .** We show the effect of strong ascertainment bias in different demes given on the x-axis on  $\psi$  calculated between samples taken from coordinates (0,10) and (0,20). N = no ascertainment. Ascertainment has very little effect if it is performed in a deme that is not used in the comparison.
